# Supplementary material
Source: publisher figshare collection journal article supplement (https://acs.figshare.com/ndownloader/files/3981043)
Supplement: Supplementary file 1 [file 3981043]

## Supplementary Information

# Facile Synthesis of One Dimensional AgBr@Ag Nanostructures and Their Visible Light Photocatalytic Properties

*Bo Li, Hua Wang\*, Bowei Zhang, Pengfei Hu, Chang Chen, Lin Guo\**

School of Chemistry and Environment, Beihang University, Beijing, 100191, P. R. of China

[\*] Professor Lin Guo & Dr. Hua Wang, Corresponding author.

\* E-mail: [guolin@buaa.edu.cn](mailto:guolin@buaa.edu.cn) & wanghua8651@gmail.com

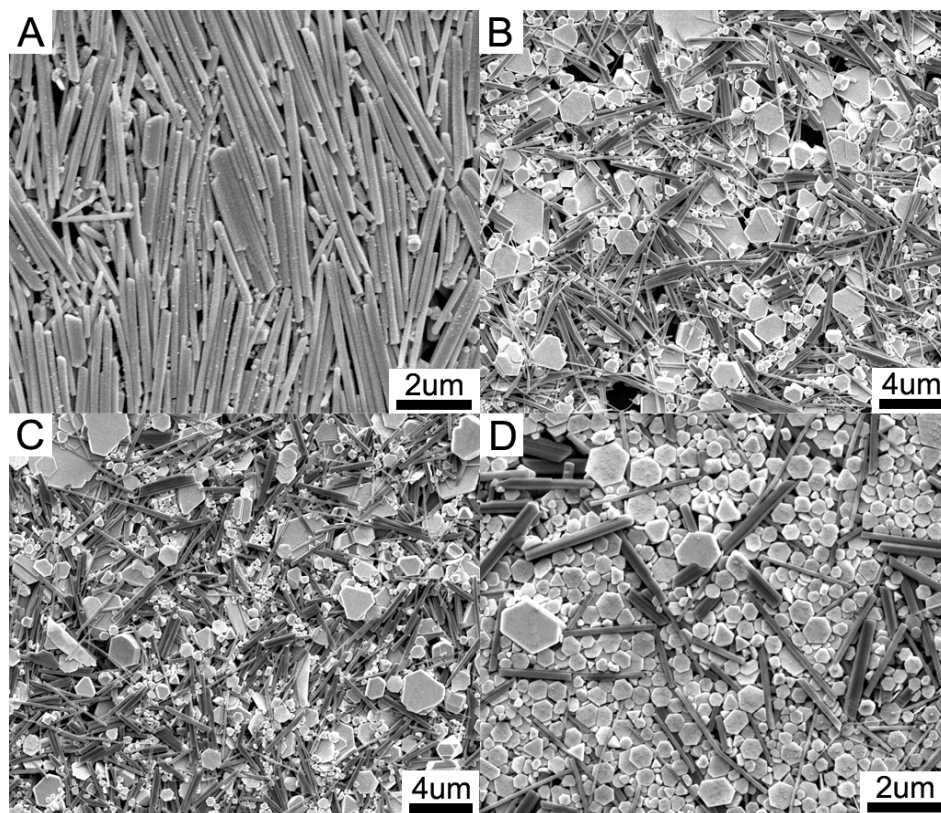

**Figure SI1.** SEM images of as-prepared products with different amount of added PVP: (A) 0.054 g; (B) 0.27 g; (C) 0.54 g; (D) 1.08 g.

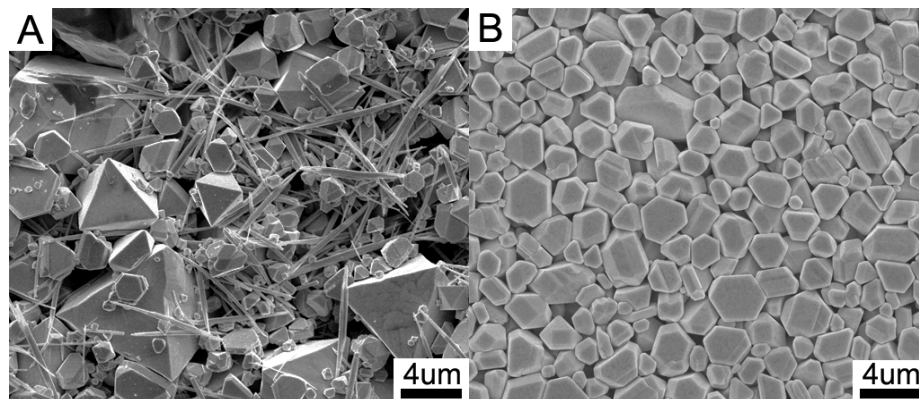

**Figure SI2.** SEM images of as-prepared products with no H<sub>2</sub>O added (A) and using AgNO<sub>3</sub> instead of CH<sub>3</sub>COOAg (B).

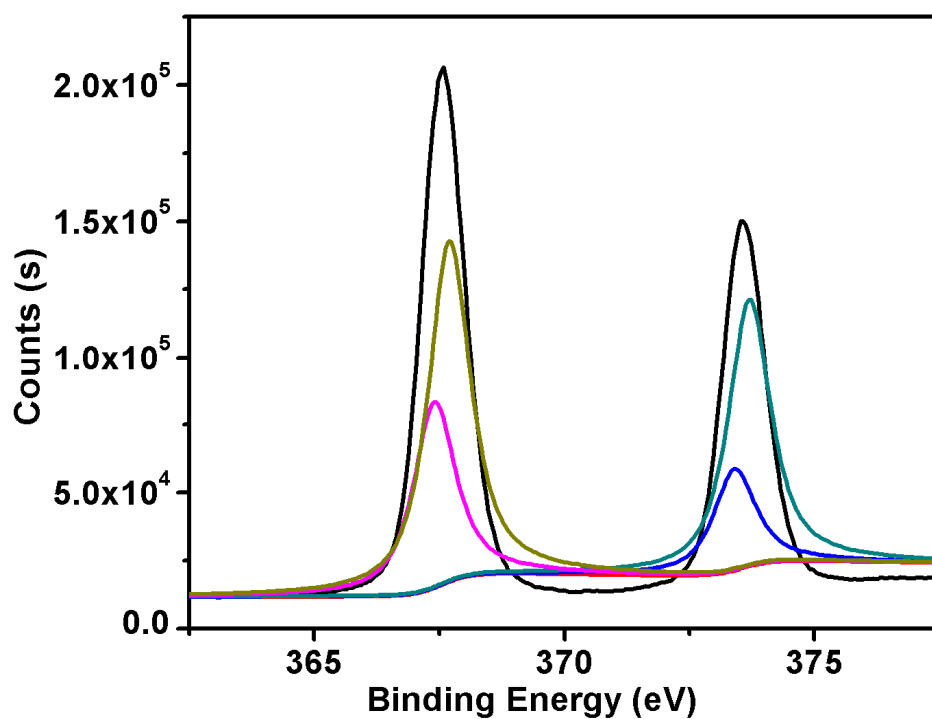

**Figure SI3.** The Ag 3d XPS spectra of as-prepared AgBr nanorods.

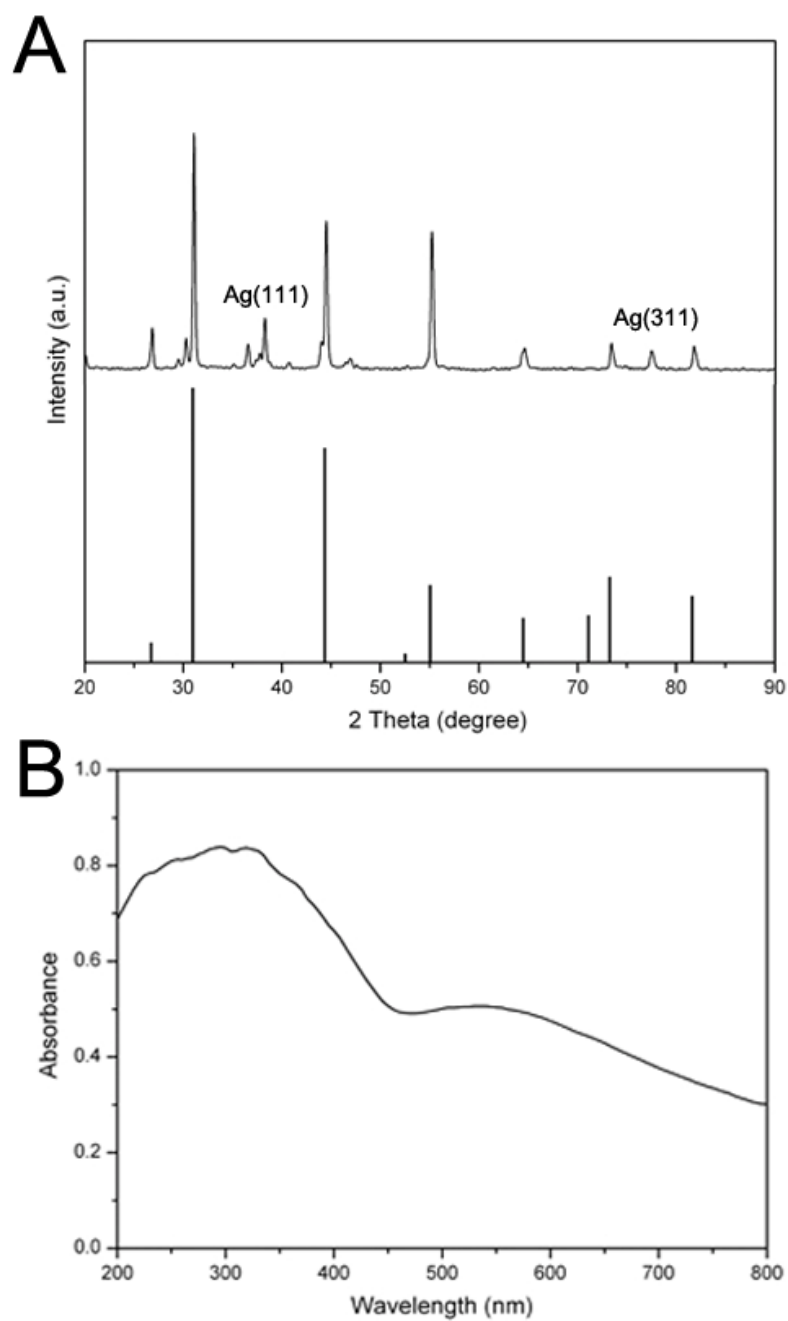

**Figure SI4.** XRD patterns and typical UV-Vis diffuse reflectance spectra (DRS) of as-prepared AgBr nanowires.
